# Supplementary material
Source: publisher figshare collection journal article supplement (https://karger.figshare.com/ndownloader/files/27900780)
Supplement: Supplementary file 1 [file 27900780]

**Supplementary Figure Legends**

**Supplementary Fig. 1.** Estimated risk of hospitalization with atrial fibrillation according to baseline QRS (a) and PR (b) intervals in the main adjusted model (association adjusted for age, sex, race/ethnicity, body mass index, diabetes mellitus, systolic blood pressure, coronary artery disease, heart failure, stroke, estimate glomerular filtration rate (via Chronic Kidney Disease Epidemiology Collaboration (CKD EPI) equation), log-transformed 24-hour urine protein, serum hematocrit, serum albumin, serum potassium, serum calcium, and clinical center). Estimated risk relative to reference QRS interval of 92 ms and PR interval of 168 ms.
